# Supplementary material
Source: HighWire-hosted journal article supplement (https://tobaccocontrol.bmj.com/content/tc-2024-059013)
Supplement: inline-supplementary-material-1 [file inline-supplementary-material-1.pdf]

Supplementary Material

Table S1: Consultation and submission inclusion criteria

|              |                                                                                                                                                                                                                                                                                                                                                                                                                                                                                                                             |
|--------------|-----------------------------------------------------------------------------------------------------------------------------------------------------------------------------------------------------------------------------------------------------------------------------------------------------------------------------------------------------------------------------------------------------------------------------------------------------------------------------------------------------------------------------|
| Consultation | Led by a state, territory, or federal government or parliament in Australia<br>Held between May 2017 and May 2023<br>Submissions were publicly available<br>Terms of reference included one or more of the following:<br>electronic nicotine delivery system(s)<br>ENDS<br>electronic cigarette(s)<br>e-cigarette(s)<br>vape(s)<br>vapo(u)ris(z)ed nicotine products<br>vapo(u)ris(z)er(s)<br>vapo(u)r device(s)<br>vapo(u)r product(s)<br>heated tobacco product(s)<br>heat-not-burn<br>smoke(-)free<br>vaping<br>vaper(s) |
| Submission   | Submitted by:<br>ENDS or tobacco manufacturer<br>ENDS or tobacco retailer<br>ENDS or tobacco manufacturer or retailer associations<br>Organisation or individual that had at any point:<br>- worked for the tobacco or ENDS industries<br>- received monetary or non-monetary gratuities from the tobacco or ENDS industries (or any organisation funded by these industries)                                                                                                                                               |

Table S2: *Final codebook, with code source*

| Code                                                                      | Source                   |
|---------------------------------------------------------------------------|--------------------------|
| <b>Practice</b>                                                           |                          |
| <i>Misuse of Evidence</i>                                                 | Deductive <sup>a</sup>   |
| Making unsupported factual assertions                                     | Inductive                |
| Promotion of weak evidence                                                | Deductive <sup>a</sup>   |
| Use of anecdotal evidence                                                 | Inductive                |
| Citing studies or authors with a conflict of interest or industry funding | Deductive <sup>bc</sup>  |
| Citing dubious sources                                                    | Deductive <sup>c</sup>   |
| Presenting qualitative research as hypothesis-testing                     | Inductive                |
| Presenting editorials or opinions as evidence                             | Inductive                |
| Modelling or simulation studies                                           | Inductive                |
| Secondary citations                                                       | Inductive                |
| Citing market research                                                    | Inductive                |
| Other                                                                     | Inductive                |
| Evidential landscaping                                                    | Deductive <sup>abd</sup> |
| Excluding relevant evidence                                               | Deductive <sup>abd</sup> |
| Claiming there is more evidence to support a point than is cited          | Deductive <sup>a</sup>   |
| Presenting positive evidence only                                         | Deductive <sup>a</sup>   |
| Citing evidence for an irrelevant point                                   | Deductive <sup>b</sup>   |
| Promoting alternative evidence                                            | Deductive <sup>abd</sup> |
| Mimicked scientific critique                                              | Deductive <sup>abd</sup> |
| Adopting the litigation (vs scientific) model                             | Deductive <sup>abd</sup> |
| Inaccurately reporting funding or affiliations                            | Inductive                |
| Stating support for evidence-based approaches                             | Deductive <sup>a</sup>   |
| Claiming authorities are ignoring evidence                                | Inductive                |
| Seeking methodological perfection                                         | Deductive <sup>abd</sup> |
| Lack of rigour                                                            | Deductive <sup>abd</sup> |
| Stating lack of evidence                                                  | Deductive <sup>a</sup>   |
| Claiming studies were flawed without specifying how                       | Inductive                |
| Misleading citation of evidence                                           | Deductive <sup>abd</sup> |
| Misquoting                                                                | Deductive <sup>abd</sup> |
| Selective quoting                                                         | Deductive <sup>abd</sup> |
| Misleading inferences                                                     | Inductive                |
| Misinterpretation                                                         | Deductive <sup>abd</sup> |
| Denying evidence                                                          | Inductive                |
| Misrepresentation of strong evidence                                      | Deductive <sup>a</sup>   |
| <i>Logical fallacies, flawed arguments</i>                                | Deductive <sup>c</sup>   |
| Bandwagon fallacy                                                         | Inductive                |
| Appeal to hypocrisy                                                       | Inductive                |
| <i>Ad hominem</i> or attribution of motives                               | Inductive                |
| False equivalence                                                         | Deductive <sup>c</sup>   |
| Diversion                                                                 | Inductive                |
| Straw man                                                                 | Deductive <sup>c</sup>   |
| Self-contradiction                                                        | Inductive                |
| <b>Arguments</b>                                                          |                          |
| <i>Denying the effectiveness of strategies</i>                            | Deductive <sup>a</sup>   |
| Making unsubstantiated claims about the adverse effects of ENDS control   | Deductive <sup>af</sup>  |
| Increase or shift risk of problems                                        | Deductive <sup>a</sup>   |
| Will make it harder for people who are currently smoking to quit          | Inductive                |
| Will drive people back to smoking                                         | Inductive                |
| Benefits the tobacco or pharmaceutical industries                         | Inductive                |
| Increase uptake of cigarettes                                             | Inductive                |
| Other                                                                     | Inductive                |

|                                                                             |                           |
|-----------------------------------------------------------------------------|---------------------------|
| Black market                                                                | Deductive <sup>bcd</sup>  |
| Increased risk of harm                                                      | Inductive                 |
| Encroachment on human/business rights, freedom of choice                    | Deductive <sup>g</sup>    |
| Hardship for businesses                                                     | Deductive <sup>af</sup>   |
| Other                                                                       | Inductive                 |
| Excessive regulatory burden                                                 | Deductive <sup>a</sup>    |
| Economy (negative impact)                                                   | Deductive <sup>abcf</sup> |
| Punishing smokers or ignoring the needs of smokers                          | Deductive <sup>f</sup>    |
| People will be driven to purchase unregulated or dangerous ENDS             | Inductive                 |
| Exacerbate social inequity                                                  | Inductive                 |
| Closure of businesses                                                       | Deductive <sup>a</sup>    |
| Imposition on those using vaping “responsibly”                              | Deductive <sup>a</sup>    |
| Job loss                                                                    | Deductive <sup>af</sup>   |
| Criminalising ENDS users or vendors                                         | Deductive <sup>f</sup>    |
| ENDS users will be financially disadvantaged                                | Inductive                 |
| Loss of tourism appeal                                                      | Deductive <sup>a</sup>    |
| Promoting alternative approaches that favour vested interests               | Deductive <sup>a</sup>    |
| Targeted approaches                                                         | Deductive <sup>a</sup>    |
| Responsible sales                                                           | Deductive <sup>a</sup>    |
| Compulsory product safety standards                                         | Inductive                 |
| Design factors                                                              | Deductive <sup>a</sup>    |
| Education                                                                   | Deductive <sup>a</sup>    |
| Law enforcement                                                             | Deductive <sup>a</sup>    |
| Treatment services or interventions                                         | Deductive <sup>a</sup>    |
| Other                                                                       | Inductive                 |
| Retailers as experts (instead of medical/pharmaceutical professionals)      | Inductive                 |
| Risk-proportionate regulation                                               | Inductive                 |
| Industry self-regulation or co-regulation                                   | Deductive <sup>a</sup>    |
| Monitoring                                                                  | Inductive                 |
| Advertising and marketing regulations                                       | Inductive                 |
| Equivalent restrictions to combustible cigarettes                           | Inductive                 |
| Promoting taxation                                                          | Inductive                 |
| Promoting personal responsibility                                           | Deductive <sup>a</sup>    |
| Making unsubstantiated claims about the benefits of a consumer model        | Inductive                 |
| Save lives or reduce harm                                                   | Inductive                 |
| Reduce smoking or cigarette sales                                           | Inductive                 |
| Economy, small business                                                     | Inductive                 |
| Drive down organised crime                                                  | Inductive                 |
| Increase quality or safety of devices                                       | Inductive                 |
| Job creation                                                                | Inductive                 |
| Save users of ENDS money                                                    | Inductive                 |
| Reduce illicit tobacco use                                                  | Inductive                 |
| Better for tobacco control than currently supported measures                | Inductive                 |
| De-criminalise users of ENDS                                                | Inductive                 |
| Making unsubstantiated claims about the ineffectiveness of policy proposals | Deductive <sup>f</sup>    |
| Other                                                                       | Inductive                 |
| People will just buy from overseas or the internet                          | Inductive                 |
| Young people will do what they want either way                              | Inductive                 |
| Control will make ENDS more appealing to youth                              | Inductive                 |
| Emphasising complexity                                                      | Deductive <sup>a</sup>    |

<sup>a</sup>Stafford et al. (2020); <sup>b</sup>Hatchard et al. (2014); <sup>c</sup>Evans-Reeves et al. (2014); <sup>d</sup>Ulucanlar et al. (2014);

<sup>e</sup>Waa et al. (2017); <sup>f</sup>Ulucanlar et al. (2016); <sup>g</sup>Hiilamo et al. (2015).

Table S3: *Communication practices and industry arguments identified in submissions, stratified by industry actor type*

| Code                                                                         | Submitter type             |                                 |                                |                                           |                                                         |                             |                       |
|------------------------------------------------------------------------------|----------------------------|---------------------------------|--------------------------------|-------------------------------------------|---------------------------------------------------------|-----------------------------|-----------------------|
|                                                                              | Retailers<br><i>n</i> = 85 | Advocacy orgs.<br><i>n</i> = 32 | Manufacturers<br><i>n</i> = 23 | Industry/trade<br>assoc.<br><i>n</i> = 22 | Legal/consulting<br>firms, individuals<br><i>n</i> = 20 | Unspecified<br><i>n</i> = 8 | Other<br><i>n</i> = 6 |
| <b>Practice</b>                                                              | <i>n</i> (%)               | <i>n</i> (%)                    | <i>n</i> (%)                   | <i>n</i> (%)                              | <i>n</i> (%)                                            | <i>n</i> (%)                | <i>n</i> (%)          |
| <i>Misuse of Evidence</i>                                                    | 81 (95)                    | 32 (100)                        | 23 (100)                       | 21 (95)                                   | 20 (100)                                                | 4 (50)                      | 6 (100)               |
| Making unsupported factual assertions                                        | 75 (88)                    | 32 (100)                        | 23 (100)                       | 20 (91)                                   | 20 (100)                                                | 3 (38)                      | 6 (100)               |
| Promotion of weak evidence                                                   | 64 (75)                    | 29 (91)                         | 18 (78)                        | 15 (68)                                   | 20 (100)                                                | 2 (25)                      | 5 (83)                |
| Use of anecdotal evidence                                                    | 57 (67)                    | 14 (44)                         | 5 (22)                         | 8 (36)                                    | 9 (45)                                                  | 2 (25)                      | 4 (67)                |
| Citing studies or authors with a conflict of interest<br>or industry funding | 14 (16)                    | 28 (88)                         | 18 (78)                        | 14 (64)                                   | 19 (95)                                                 | 0 (0)                       | 1 (17)                |
| Citing dubious sources                                                       | 9 (11)                     | 20 (63)                         | 15 (65)                        | 5 (23)                                    | 14 (70)                                                 | 0 (0)                       | 2 (33)                |
| Presenting qualitative research as hypothesis-<br>testing                    | 0 (0)                      | 9 (28)                          | 4 (17)                         | 0 (0)                                     | 4 (20)                                                  | 0 (0)                       | 0 (0)                 |
| Presenting editorials or opinions as evidence                                | 0 (0)                      | 4 (13)                          | 4 (17)                         | 1 (5)                                     | 6 (30)                                                  | 0 (0)                       | 0 (0)                 |
| Modelling or simulation studies                                              | 0 (0)                      | 6 (19)                          | 4 (17)                         | 1 (5)                                     | 4 (20)                                                  | 0 (0)                       | 0 (0)                 |
| Secondary citations                                                          | 1 (1)                      | 3 (9)                           | 5 (22)                         | 1 (5)                                     | 4 (20)                                                  | 0 (0)                       | 0 (0)                 |
| Citing market research                                                       | 0 (0)                      | 0 (0)                           | 6 (26)                         | 0 (0)                                     | 0 (0)                                                   | 0 (0)                       | 0 (0)                 |
| Other                                                                        | 0 (0)                      | 1 (3)                           | 1 (4)                          | 0 (0)                                     | 0 (0)                                                   | 0 (0)                       | 0 (0)                 |
| <i>Evidential landscaping</i>                                                | 36 (42)                    | 26 (81)                         | 19 (83)                        | 13 (59)                                   | 15 (75)                                                 | 1 (13)                      | 3 (50)                |
| Excluding relevant evidence                                                  | 30 (35)                    | 21 (66)                         | 18 (78)                        | 11 (50)                                   | 13 (65)                                                 | 1 (13)                      | 3 (50)                |
| Claiming there is more evidence to support a<br>point than is cited          | 30 (35)                    | 20 (63)                         | 18 (78)                        | 11 (50)                                   | 12 (60)                                                 | 1 (13)                      | 3 (50)                |
| Presenting positive evidence only                                            | 1 (1)                      | 3 (9)                           | 1 (4)                          | 0 (0)                                     | 2 (10)                                                  | 0 (0)                       | 0 (0)                 |
| Citing evidence for an irrelevant point                                      | 3 (4)                      | 16 (50)                         | 11 (48)                        | 3 (14)                                    | 5 (25)                                                  | 0 (0)                       | 0 (0)                 |
| Promoting alternative evidence                                               | 4 (5)                      | 10 (31)                         | 7 (30)                         | 1 (5)                                     | 3 (15)                                                  | 0 (0)                       | 0 (0)                 |
| <i>Mimicked scientific critique</i>                                          | 22 (26)                    | 27 (84)                         | 20 (87)                        | 15 (68)                                   | 15 (75)                                                 | 0 (0)                       | 3 (50)                |
| Adopting the litigation (vs scientific) model                                | 6 (7)                      | 22 (69)                         | 17 (74)                        | 11 (50)                                   | 14 (70)                                                 | 0 (0)                       | 1 (17)                |
| Inaccurately reporting funding or affiliations                               | 0 (0)                      | 18 (56)                         | 3 (13)                         | 2 (9)                                     | 8 (40)                                                  | 0 (0)                       | 0 (0)                 |
| Stating support for evidence-based approaches                                | 8 (9)                      | 19 (59)                         | 16 (70)                        | 7 (32)                                    | 7 (35)                                                  | 0 (0)                       | 1 (17)                |
| Claiming authorities are ignoring evidence                                   | 17 (20)                    | 11 (34)                         | 5 (22)                         | 3 (14)                                    | 7 (35)                                                  | 0 (0)                       | 0 (0)                 |
| Seeking methodological perfection                                            | 0 (0)                      | 7 (22)                          | 3 (13)                         | 0 (0)                                     | 5 (25)                                                  | 0 (0)                       | 0 (0)                 |
| Lack of rigour                                                               | 0 (0)                      | 3 (9)                           | 0 (0)                          | 0 (0)                                     | 3 (15)                                                  | 0 (0)                       | 1 (17)                |
| Stating lack of evidence                                                     | 1 (1)                      | 3 (9)                           | 0 (0)                          | 0 (0)                                     | 0 (0)                                                   | 0 (0)                       | 1 (17)                |

## Industry actor communication practices in submissions on ENDS policy in Australia

5

|                                                                         |         |          |          |          |          |        |         |
|-------------------------------------------------------------------------|---------|----------|----------|----------|----------|--------|---------|
| Claiming studies were flawed without specifying how                     | 0 (0)   | 3 (9)    | 0 (0)    | 0 (0)    | 0 (0)    | 0 (0)  | 1 (17)  |
| Misleading citation of evidence                                         | 16 (19) | 28 (88)  | 16 (70)  | 14 (64)  | 17 (85)  | 1 (13) | 2 (33)  |
| Misquoting                                                              | 14 (16) | 25 (78)  | 13 (57)  | 10 (45)  | 11 (55)  | 1 (13) | 1 (17)  |
| Selective quoting                                                       | 7 (8)   | 21 (66)  | 13 (57)  | 8 (36)   | 12 (60)  | 0 (0)  | 1 (17)  |
| Misleading inferences                                                   | 2 (2)   | 15 (47)  | 13 (57)  | 5 (23)   | 12 (60)  | 0 (0)  | 2 (33)  |
| Misinterpretation                                                       | 2 (2)   | 8 (25)   | 3 (13)   | 1 (5)    | 8 (40)   | 0 (0)  | 0 (0)   |
| Denying evidence                                                        | 18 (21) | 19 (59)  | 11 (48)  | 4 (18)   | 10 (50)  | 2 (25) | 1 (17)  |
| Misrepresentation of strong evidence                                    | 0 (0)   | 3 (9)    | 2 (9)    | 0 (0)    | 1 (5)    | 0 (0)  | 0 (0)   |
| <i>Logical fallacies, flawed arguments</i>                              | 70 (82) | 31 (97)  | 21 (91)  | 20 (91)  | 19 (95)  | 3 (38) | 6 (100) |
| Bandwagon fallacy                                                       | 49 (58) | 24 (75)  | 18 (78)  | 17 (77)  | 16 (80)  | 1 (13) | 3 (50)  |
| Appeal to hypocrisy                                                     | 33 (39) | 22 (69)  | 7 (30)   | 9 (41)   | 14 (70)  | 0 (0)  | 2 (33)  |
| Ad hominem or attribution of motives                                    | 24 (28) | 18 (56)  | 3 (13)   | 2 (9)    | 14 (70)  | 2 (25) | 2 (33)  |
| False equivalence                                                       | 18 (21) | 24 (75)  | 9 (39)   | 3 (14)   | 8 (40)   | 1 (13) | 3 (50)  |
| Diversion                                                               | 22 (26) | 5 (16)   | 7 (30)   | 6 (27)   | 3 (15)   | 2 (25) | 4 (67)  |
| Straw man                                                               | 14 (16) | 14 (44)  | 3 (13)   | 0 (0)    | 8 (40)   | 1 (13) | 0 (0)   |
| Self-contradiction                                                      | 3 (4)   | 10 (31)  | 1 (4)    | 0 (0)    | 6 (30)   | 0 (0)  | 1 (17)  |
| <b>Arguments</b>                                                        |         |          |          |          |          |        |         |
| <i>Denying the effectiveness of strategies</i>                          | 78 (92) | 32 (100) | 23 (100) | 22 (100) | 20 (100) | 4 (50) | 6 (100) |
| Making unsubstantiated claims about the adverse effects of ENDS control | 70 (82) | 32 (100) | 20 (87)  | 19 (86)  | 14 (70)  | 3 (38) | 6 (100) |
| Increase or shift risk of problems                                      | 40 (47) | 24 (75)  | 12 (52)  | 8 (36)   | 11 (55)  | 3 (38) | 4 (67)  |
| Will make it harder for people who are currently smoking to quit        | 26 (31) | 17 (53)  | 11 (48)  | 6 (27)   | 5 (25)   | 3 (38) | 3 (50)  |
| Will drive people back to smoking                                       | 20 (24) | 12 (38)  | 7 (30)   | 0 (0)    | 2 (10)   | 2 (25) | 3 (50)  |
| Benefits the tobacco or pharmaceutical industries                       | 7 (8)   | 11 (34)  | 1 (4)    | 2 (9)    | 6 (30)   | 1 (13) | 0 (0)   |
| Increase uptake of cigarettes                                           | 3 (4)   | 2 (6)    | 0 (0)    | 0 (0)    | 1 (5)    | 0 (0)  | 0 (0)   |
| Other                                                                   | 2 (2)   | 0 (0)    | 0 (0)    | 1 (5)    | 0 (0)    | 0 (0)  | 2 (33)  |
| Black market                                                            | 37 (44) | 15 (47)  | 9 (39)   | 13 (59)  | 5 (25)   | 1 (13) | 5 (83)  |
| Increased risk of harm                                                  | 34 (40) | 22 (69)  | 10 (43)  | 7 (32)   | 7 (35)   | 1 (13) | 3 (50)  |
| Encroachment on human/business rights, freedom of choice                | 21 (25) | 20 (63)  | 8 (35)   | 6 (27)   | 3 (15)   | 2 (25) | 2 (33)  |
| Hardship for businesses                                                 | 25 (29) | 4 (13)   | 2 (9)    | 6 (27)   | 0 (0)    | 0 (0)  | 3 (50)  |
| Other                                                                   | 16 (19) | 8 (25)   | 5 (22)   | 5 (23)   | 5 (25)   | 1 (13) | 3 (50)  |
| Excessive regulatory burden                                             | 15 (18) | 9 (28)   | 7 (30)   | 4 (18)   | 4 (20)   | 0 (0)  | 1 (17)  |

## Industry actor communication practices in submissions on ENDS policy in Australia

6

|                                                                        |         |         |          |         |         |        |        |
|------------------------------------------------------------------------|---------|---------|----------|---------|---------|--------|--------|
| Economy (negative impact)                                              | 17 (20) | 5 (16)  | 3 (13)   | 7 (32)  | 2 (10)  | 0 (0)  | 2 (33) |
| Punishing smokers or ignoring the needs of smokers                     | 4 (5)   | 12 (38) | 6 (26)   | 2 (9)   | 4 (20)  | 0 (0)  | 0 (0)  |
| People will be driven to purchase unregulated or dangerous ENDS        | 9 (11)  | 6 (19)  | 1 (4)    | 3 (14)  | 1 (5)   | 0 (0)  | 2 (33) |
| Exacerbate social inequity                                             | 2 (2)   | 7 (22)  | 2 (9)    | 2 (9)   | 3 (15)  | 0 (0)  | 3 (50) |
| Closure of businesses                                                  | 12 (14) | 3 (9)   | 1 (4)    | 0 (0)   | 0 (0)   | 0 (0)  | 2 (33) |
| Imposition on those using vaping “responsibly”                         | 6 (7)   | 3 (9)   | 1 (4)    | 2 (9)   | 1 (5)   | 0 (0)  | 0 (0)  |
| Job loss                                                               | 10 (12) | 1 (3)   | 0 (0)    | 1 (5)   | 1 (5)   | 0 (0)  | 1 (17) |
| Criminalising ENDS users or vendors                                    | 1 (1)   | 7 (22)  | 1 (4)    | 2 (9)   | 0 (0)   | 0 (0)  | 0 (0)  |
| ENDS users will be financially disadvantaged                           | 4 (5)   | 3 (9)   | 0 (0)    | 1 (5)   | 0 (0)   | 1 (13) | 2 (33) |
| Loss of tourism appeal                                                 | 1 (1)   | 0 (0)   | 0 (0)    | 0 (0)   | 0 (0)   | 0 (0)  | 0 (0)  |
| Promoting alternative approaches that favour vested interests          | 67 (79) | 30 (94) | 23 (100) | 19 (86) | 16 (80) | 4 (50) | 5 (83) |
| Targeted approaches                                                    | 47 (55) | 17 (53) | 21 (91)  | 14 (64) | 13 (65) | 3 (38) | 4 (67) |
| Responsible sales                                                      | 37 (44) | 10 (31) | 11 (48)  | 8 (36)  | 10 (50) | 3 (38) | 2 (33) |
| Compulsory product safety standards                                    | 19 (22) | 12 (38) | 20 (87)  | 8 (36)  | 9 (45)  | 1 (13) | 1 (17) |
| Design factors                                                         | 9 (11)  | 5 (16)  | 13 (57)  | 2 (9)   | 4 (20)  | 1 (13) | 1 (17) |
| Education                                                              | 8 (9)   | 7 (22)  | 6 (26)   | 3 (14)  | 3 (15)  | 0 (0)  | 1 (17) |
| Law enforcement                                                        | 10 (12) | 4 (13)  | 7 (30)   | 3 (14)  | 1 (5)   | 0 (0)  | 3 (50) |
| Treatment services or interventions                                    | 0 (0)   | 0 (0)   | 1 (4)    | 0 (0)   | 0 (0)   | 0 (0)  | 0 (0)  |
| Other                                                                  | 41 (48) | 18 (56) | 17 (74)  | 13 (59) | 10 (50) | 2 (25) | 4 (67) |
| Retailers as experts (instead of medical/pharmaceutical professionals) | 35 (41) | 6 (19)  | 2 (9)    | 7 (32)  | 1 (5)   | 2 (25) | 1 (17) |
| Risk-proportionate regulation                                          | 8 (9)   | 18 (56) | 13 (57)  | 4 (18)  | 8 (40)  | 0 (0)  | 0 (0)  |
| Industry self-regulation or co-regulation                              | 19 (22) | 5 (16)  | 15 (65)  | 5 (23)  | 2 (10)  | 1 (13) | 1 (17) |
| Monitoring                                                             | 16 (19) | 6 (19)  | 12 (52)  | 4 (18)  | 5 (25)  | 1 (13) | 1 (17) |
| Advertising and marketing regulations                                  | 10 (12) | 10 (31) | 12 (52)  | 2 (9)   | 8 (40)  | 0 (0)  | 1 (17) |
| Equivalent restrictions to combustible cigarettes                      | 8 (9)   | 7 (22)  | 3 (13)   | 2 (9)   | 3 (15)  | 0 (0)  | 0 (0)  |
| Promoting taxation                                                     | 2 (2)   | 2 (6)   | 0 (0)    | 0 (0)   | 2 (10)  | 0 (0)  | 0 (0)  |
| Promoting personal responsibility                                      | 1 (1)   | 3 (9)   | 0 (0)    | 0 (0)   | 0 (0)   | 0 (0)  | 0 (0)  |
| Making unsubstantiated claims about the benefits of a consumer model   | 44 (52) | 25 (78) | 17 (74)  | 17 (77) | 9 (45)  | 1 (13) | 3 (50) |
| Save lives or reduce harm                                              | 20 (24) | 16 (50) | 10 (43)  | 10 (45) | 6 (30)  | 1 (13) | 1 (17) |
| Reduce smoking or cigarette sales                                      | 15 (18) | 16 (50) | 10 (43)  | 14 (64) | 5 (25)  | 1 (13) | 3 (50) |

Industry actor communication practices in submissions on ENDS policy in Australia

7

|                                                                             |         |         |        |         |        |        |        |
|-----------------------------------------------------------------------------|---------|---------|--------|---------|--------|--------|--------|
| Economy, small business                                                     | 23 (27) | 10 (31) | 1 (4)  | 12 (55) | 2 (10) | 0 (0)  | 2 (33) |
| Drive down organised crime                                                  | 5 (6)   | 10 (31) | 5 (22) | 6 (27)  | 0 (0)  | 1 (13) | 2 (33) |
| Increase quality or safety of devices                                       | 8 (9)   | 6 (19)  | 4 (17) | 5 (23)  | 0 (0)  | 0 (0)  | 1 (17) |
| Job creation                                                                | 11 (13) | 2 (6)   | 0 (0)  | 2 (9)   | 1 (5)  | 0 (0)  | 0 (0)  |
| Save users of ENDS money                                                    | 0 (0)   | 2 (6)   | 1 (4)  | 2 (9)   | 1 (5)  | 0 (0)  | 1 (17) |
| Reduce illicit tobacco use                                                  | 0 (0)   | 4 (13)  | 0 (0)  | 0 (0)   | 0 (0)  | 0 (0)  | 0 (0)  |
| Better for tobacco control than currently supported measures                | 1 (1)   | 1 (3)   | 0 (0)  | 1 (5)   | 1 (5)  | 0 (0)  | 0 (0)  |
| De-criminalise users of ENDS                                                | 1 (1)   | 1 (3)   | 0 (0)  | 0 (0)   | 0 (0)  | 0 (0)  | 0 (0)  |
| Making unsubstantiated claims about the ineffectiveness of policy proposals | 14 (16) | 6 (19)  | 5 (22) | 6 (27)  | 4 (20) | 0 (0)  | 3 (50) |
| Other                                                                       | 8 (9)   | 4 (13)  | 5 (22) | 3 (14)  | 1 (5)  | 0 (0)  | 3 (50) |
| People will just buy from overseas or the internet                          | 2 (2)   | 1 (3)   | 0 (0)  | 3 (14)  | 3 (15) | 0 (0)  | 0 (0)  |
| Young people will do what they want either way                              | 3 (4)   | 2 (6)   | 0 (0)  | 0 (0)   | 0 (0)  | 0 (0)  | 0 (0)  |
| Control will make ENDS more appealing to youth                              | 2 (2)   | 0 (0)   | 0 (0)  | 0 (0)   | 0 (0)  | 0 (0)  | 0 (0)  |
| Emphasising complexity                                                      | 0 (0)   | 0 (0)   | 2 (9)  | 0 (0)   | 0 (0)  | 0 (0)  | 0 (0)  |

Note. Significance testing not conducted due to small samples sizes.
